# Supplementary material for: Prognostic Risk Assessment and Prediction of Radiotherapy Benefit for Women with Ductal Carcinoma In Situ (DCIS) of the Breast, in a Randomized Clinical Trial (SweDCIS)
Source: MDPI journal article supplement (doi:10.3390/cancers13236103), 2021-12-03
Supplement: s1 [file s1]

# **Prognostic Risk Assessment and Prediction of Radiotherapy Benefit for Women with Ductal Carcinoma In Situ (DCIS) of the Breast, in a Randomized Clinical Trial (SweDCIS)**

**Fredrik Wärnberg <sup>1,\*</sup>, Per Karlsson <sup>2</sup>, Erik Holmberg <sup>2</sup>, Kerstin Sandelin <sup>3</sup>, Pat W. Whitworth <sup>4</sup>, Jess Savala <sup>5</sup>, Todd Barry <sup>6</sup>, Glen Leesman <sup>5</sup>, Steven P. Linke <sup>7</sup>, Steven C. Shivers <sup>5</sup>, Frank Vicini <sup>8</sup>, Chirag Shah <sup>9</sup>, Sheila Weinmann <sup>10</sup>, Gregory Bruce Mann <sup>11</sup> and Troy Bremer <sup>5,\*</sup>**

**Table S1.** . Patient clinicopathologic factors, treatment, and events for SweDCIS trial cohort with negative margins and patients included and not included in the Validation Cohort.

|                                 | SweDCIS trial<br>Negative margins<br>(n = 857) |       | Complete data<br>subset*<br>(n = 582) |       | SweDCIS trial<br>negative margins<br>(n = 857) |      | Validation Cohort<br>Negative margins (n<br>= 504) |       | SweDCIS trial<br>Negative margins<br>not included in<br>Validation Cohort<br>(n = 353) |       | p*   |
|---------------------------------|------------------------------------------------|-------|---------------------------------------|-------|------------------------------------------------|------|----------------------------------------------------|-------|----------------------------------------------------------------------------------------|-------|------|
| <b>Age, mean (sd)</b>           | 57.1                                           | (9.1) | 57.3                                  | (9.1) |                                                |      | 57.6                                               | (9.1) | 56.4                                                                                   | (9.0) | 0.06 |
| <b>Year of diagnosis, n (%)</b> |                                                |       |                                       |       |                                                |      |                                                    |       |                                                                                        |       | 0.40 |
| 1987-1994                       | 491                                            | (57)  | 329                                   | (57)  | 491                                            | (57) | 295                                                | (59)  | 196                                                                                    | (56)  |      |
| 1995-2000                       | 366                                            | (43)  | 253                                   | (43)  | 366                                            | (43) | 209                                                | (41)  | 157                                                                                    | (44)  |      |
| <b>Mode of detection, n (%)</b> |                                                |       |                                       |       |                                                |      |                                                    |       |                                                                                        |       | 0.16 |
| Screening                       | 689                                            | (80)  | 464                                   | (80)  | 689                                            | (81) | 414                                                | (82)  | 275                                                                                    | (78)  |      |
| Non screening                   | 165                                            | (19)  | 117                                   | (20)  | 165                                            | (19) | 89                                                 | (18)  | 76                                                                                     | (22)  |      |
| Missing                         | 3                                              | (0)   | 1                                     | (0)   | 3                                              | (0)  | 1                                                  | (0)   | 2                                                                                      | (1)   |      |
| <b>Palpable, n (%)</b>          |                                                |       |                                       |       |                                                |      |                                                    |       |                                                                                        |       | 0.31 |
| Yes                             | 192                                            | (22)  | 129                                   | (22)  | 192                                            | (22) | 110                                                | (22)  | 82                                                                                     | (23)  |      |
| No                              | 642                                            | (75)  | 453                                   | (78)  | 642                                            | (75) | 394                                                | (78)  | 248                                                                                    | (70)  |      |
| Missing                         | 23                                             | (3)   | -                                     | -     | 23                                             | (3)  | -                                                  | -     | 23                                                                                     | (7)   |      |
| <b>Size, n (%)</b>              |                                                |       |                                       |       |                                                |      |                                                    |       |                                                                                        |       | 0.72 |
| ≤1 cm                           | 398                                            | (46)  | 273                                   | (47)  | 398                                            | (46) | 240                                                | (48)  | 158                                                                                    | (45)  |      |
| >1 cm                           | 428                                            | (50)  | 309                                   | (53)  | 428                                            | (50) | 264                                                | (52)  | 164                                                                                    | (46)  |      |
| Missing                         | 31                                             | (4)   | -                                     | -     | 31                                             | (4)  | -                                                  | -     | 31                                                                                     | (9)   |      |
| <b>Nuclear grade, n (%)</b>     |                                                |       |                                       |       |                                                |      |                                                    |       |                                                                                        |       | 0.38 |
| 1                               | 175                                            | (20)  | 180                                   | (31)  | 175                                            | (20) | 155                                                | (31)  | 20                                                                                     | (6)   |      |
| 2                               | 185                                            | (22)  | 185                                   | (32)  | 185                                            | (22) | 164                                                | (33)  | 21                                                                                     | (6)   |      |
| 3                               | 219                                            | (26)  | 217                                   | (37)  | 219                                            | (26) | 185                                                | (37)  | 34                                                                                     | (10)  |      |
| Missing                         | 278                                            | (32)  | -                                     | -     | 278                                            | (32) | -                                                  | -     | 278                                                                                    | (79)  |      |
| <b>Radiotherapy, n (%)</b>      |                                                |       |                                       |       |                                                |      |                                                    |       |                                                                                        |       | 0.94 |
| Yes                             | 436                                            | (51)  | 292                                   | (50)  | 436                                            | (51) | 257                                                | (51)  | 179                                                                                    | (51)  |      |
| No                              | 421                                            | (49)  | 290                                   | (50)  | 421                                            | (49) | 247                                                | (49)  | 174                                                                                    | (49)  |      |
| <b>Hormonal therapy, n (%)</b>  |                                                |       |                                       |       |                                                |      |                                                    |       |                                                                                        |       | 0.85 |
| Yes                             | 30                                             | (4)   | 19                                    | (3)   | 30                                             | (4)  | 17                                                 | (3)   | 13                                                                                     | (4)   |      |
| No                              | 827                                            | (96)  | 563                                   | (97)  | 827                                            | (96) | 487                                                | (97)  | 340                                                                                    | (96)  |      |

**Table S1. (CONTINUED).** Patient clinicopathologic factors, treatment, and events for SweDCIS trial cohort with negative margins and patients included and not included in the Validation Cohort.

|                                                          | SweDCIS trial<br>Negative margins<br>( <i>n</i> = 857) |      | Complete<br>data<br>subset*<br>( <i>n</i> = 582) |      | SweDCIS<br>trial<br>negative<br>margins<br>( <i>n</i> = 857) |      | Validation Cohort<br>Negative margins<br>( <i>n</i> = 504) |      | SweDCIS trial<br>Negative margins<br>not included in Val-<br>idation Cohort ( <i>n</i> =<br>353) |      | p*   |
|----------------------------------------------------------|--------------------------------------------------------|------|--------------------------------------------------|------|--------------------------------------------------------------|------|------------------------------------------------------------|------|--------------------------------------------------------------------------------------------------|------|------|
| First ipsilateral<br>events<br>within 10-years, n<br>(%) |                                                        |      |                                                  |      |                                                              |      |                                                            |      |                                                                                                  |      | 0.04 |
| New DCIS                                                 | 86                                                     | (10) | 73                                               | (13) | 86                                                           | (10) | 59                                                         | (12) | 27                                                                                               | (8)  |      |
| InvBE - Invasive BC                                      | 61                                                     | (7)  | 45                                               | (8)  | 61                                                           | (7)  | 31                                                         | (6)  | 30                                                                                               | (8)  |      |
| InvBE - Metastases                                       | 3                                                      | (0)  | -                                                | -    | 3                                                            | (0)  | -                                                          | -    | 3                                                                                                | (1)  |      |
| Censored - BC-<br>death                                  | 1                                                      | (0)  | 1                                                | (0)  | 1                                                            | (0)  | 1                                                          | (0)  | -                                                                                                | -    |      |
| Censored - other<br>death                                | 48                                                     | (6)  | 34                                               | (5)  | 48                                                           | (6)  | 30                                                         | (6)  | 18                                                                                               | (5)  |      |
| Censored at end of<br>follow-up                          | 658                                                    | (77) | 429                                              | (74) | 658                                                          | (77) | 383                                                        | (76) | 275                                                                                              | (78) |      |
| First contralateral<br>events within 10<br>years, n (%)  |                                                        |      |                                                  |      |                                                              |      |                                                            |      |                                                                                                  |      | 0.97 |
| New DCIS                                                 | 12                                                     | (1)  | 10                                               | (2)  | 12                                                           | (1)  | 7                                                          | (1)  | 5                                                                                                | (1)  |      |
| Invasive BC                                              | 34                                                     | (4)  | 25                                               | (4)  | 34                                                           | (4)  | 21                                                         | (4)  | 13                                                                                               | (4)  |      |

\*Comparing the Validation Cohort (*n* = 504) with those with negative margin in SweDCIS but not included in the Validation Cohort. Two-sample t test was used for Age, otherwise Fisher's exact test was used. Abbreviations: BC = Breast cancer. InvBE = Invasive breast events.

**Table S2.** Patient clinicopathologic factors, treatment, and events for SweDCIS trial cohort with negative margins included in the Validation Cohort with and without radiotherapy (RT).

|                          | Validation cohort Negative margins<br>(n = 504) |         | Validation Cohort Negative margins No RT<br>(n = 247) |         | Validation Cohort Negative margins, RT<br>(n = 257) |         | p*    |
|--------------------------|-------------------------------------------------|---------|-------------------------------------------------------|---------|-----------------------------------------------------|---------|-------|
| Age, mean (sd)           | 57.6                                            | (9.1)   | 57.5                                                  | (8.7)   | 57.7                                                | (9.6)   | 0.73  |
| Age, median (min-max)    | 57.6                                            | (29-79) | 57.3                                                  | (29-79) | 55.8                                                | (34-76) | 0.67  |
| Age group, n (%)         |                                                 |         |                                                       |         |                                                     |         | 0.036 |
| <50                      | 116                                             | (23)    | 56                                                    | (23)    | 60                                                  | (23)    |       |
| 50-69                    | 348                                             | (69)    | 179                                                   | (72)    | 169                                                 | (66)    |       |
| ≥70                      | 40                                              | (8)     | 12                                                    | (5)     | 28                                                  | (11)    |       |
| Year of diagnosis, n (%) |                                                 |         |                                                       |         |                                                     |         | 0.59  |
| 1987-1994                | 295                                             | (59)    | 148                                                   | (60)    | 147                                                 | (57)    |       |
| 1995-2000                | 209                                             | (41)    | 99                                                    | (40)    | 110                                                 | (43)    |       |
| Mode of detection, n (%) |                                                 |         |                                                       |         |                                                     |         | 0.82  |
| Screening                | 414                                             | (82)    | 201                                                   | (81)    | 213                                                 | (83)    |       |
| Non screening            | 89                                              | (18)    | 45                                                    | (18)    | 44                                                  | (17)    |       |
| Missing                  | 1                                               | (0)     | 1                                                     | (0)     | -                                                   | -       |       |
| Palpable, n (%)          |                                                 |         |                                                       |         |                                                     |         | 0.91  |
| Yes                      | 110                                             | (22)    | 53                                                    | (21)    | 27                                                  | (22)    |       |
| No                       | 394                                             | (78)    | 194                                                   | (79)    | 200                                                 | (78)    |       |
| Size, n (%)              |                                                 |         |                                                       |         |                                                     |         | 0.93  |
| ≤1 cm                    | 240                                             | (48)    | 117                                                   | (47)    | 123                                                 | (48)    |       |
| >1 cm                    | 264                                             | (52)    | 130                                                   | (53)    | 134                                                 | (52)    |       |
| Nuclear grade, n (%)     |                                                 |         |                                                       |         |                                                     |         | 0.84  |
| 1                        | 155                                             | (31)    | 73                                                    | (30)    | 82                                                  | (32)    |       |
| 2                        | 164                                             | (33)    | 81                                                    | (33)    | 83                                                  | (32)    |       |
| 3                        | 185                                             | (37)    | 93                                                    | (38)    | 92                                                  | (36)    |       |
| Hormonal therapy, n (%)  |                                                 |         |                                                       |         |                                                     |         | 0.81  |
| Yes                      | 17                                              | (3)     | 9                                                     | (4)     | 8                                                   | (3)     |       |
| No                       | 487                                             | (97)    | 238                                                   | (96)    | 249                                                 | (97)    |       |

**Table S2. (CONTINUED):** Patient clinicopathologic factors, treatment, and events for SweDCIS trial cohort with negative margins included in the Validation Cohort without and with radiotherapy (RT).

|                                                   | Validation Cohort Negative margins<br>(n = 504) |      | Validation Cohort Negative margins No RT<br>(n = 247) |      | Validation Cohort Negative margins, RT<br>(n = 257) |      | p*                  |
|---------------------------------------------------|-------------------------------------------------|------|-------------------------------------------------------|------|-----------------------------------------------------|------|---------------------|
| First ipsilateral events within 10-years, n (%)   |                                                 |      |                                                       |      |                                                     |      | <0.001 <sup>#</sup> |
| New DCIS                                          | 59                                              | (12) | 41                                                    | (17) | 18                                                  | (7)  |                     |
| InvBE - Invasive BC                               | 31                                              | (6)  | 20                                                    | (8)  | 11                                                  | (4)  |                     |
| InvBE - Metastases                                | -                                               | -    | -                                                     | -    | -                                                   | -    |                     |
| Censored - BC-death                               | 1                                               | (0)  | -                                                     | -    | 1                                                   | (0)  |                     |
| Censored - other death                            | 30                                              | (6)  | 16                                                    | (6)  | 14                                                  | (5)  |                     |
| Censored at end of follow-up                      | 383                                             | (76) | 170                                                   | (69) | 213                                                 | (83) |                     |
| First contralateral events within 10 years, n (%) |                                                 |      |                                                       |      |                                                     |      | 0.071 <sup>#</sup>  |
| New DCIS                                          | 7                                               | (1)  | 5                                                     | (2)  | 2                                                   | (1)  |                     |
| Invasive BC                                       | 21                                              | (4)  | 6                                                     | (2)  | 15                                                  | (6)  |                     |

\* Comparing the Validation Cohort ( $n = 504$ ) with those with negative margin in SweDCIS but not included in the Validation Cohort. Two-sample t test or Mann-Whitney test was used for Age, otherwise Fisher's exact test was used.

# When testing differences in number of events, groups are new DCIS, InvBE and censored. Abbreviations: BC = Breast cancer. InvBE = Invasive breast events.

**Table S3.** Multivariable Cox proportional hazards analysis allowing for interaction between RT and categorical DS, using alternative thresholds for  $DS > x$ , in 504 women with complete biosignature data and free margins from the SweDCIS trial.

**A. Interaction analysis for 10-year total breast event rates.**

| Cut-off<br>( $DS > x$ )<br>$x$ | Events and<br>number<br>low risk<br>group ( $DS \leq x$ ) | Events and<br>number<br>elevated risk<br>group ( $DS > x$ ) | RT Effect (No RT/RT)<br>low risk group<br>( $DS \leq x$ )<br>HR (95% CI), $p$ | RT Effect (No RT/RT)<br>elevated risk group<br>( $DS > x$ )<br>HR (95% CI), $p$ | RT: ( $DS > x$ )<br>Interaction<br>LR test<br>$p$ |
|--------------------------------|-----------------------------------------------------------|-------------------------------------------------------------|-------------------------------------------------------------------------------|---------------------------------------------------------------------------------|---------------------------------------------------|
| 1.0                            | 22/147                                                    | 68/357                                                      | 0.51 (0.22–1.22), $p = 0.13$                                                  | <b>0.38 (0.22–0.63), <math>p &lt; .001</math></b>                               | 0.52                                              |
| 2.0                            | 29/182                                                    | 61/322                                                      | 0.48 (0.22–1.03), $p = 0.061$                                                 | <b>0.37 (0.22–0.64), <math>p &lt; .001</math></b>                               | 0.57                                              |
| 2.5                            | 30/202                                                    | 60/302                                                      | 0.56 (0.27–1.18), $p = 0.127$                                                 | <b>0.34 (0.19–0.58), <math>p &lt; .001</math></b>                               | 0.26                                              |
| 2.6                            | 30/203                                                    | 60/301                                                      | 0.56 (0.26–1.17), $p = 0.120$                                                 | <b>0.34 (0.19–0.59), <math>p &lt; .001</math></b>                               | 0.28                                              |
| 2.7                            | 33/212                                                    | 57/292                                                      | 0.56 (0.28–1.14), $p = 0.110$                                                 | <b>0.33 (0.19–0.58), <math>p &lt; .001</math></b>                               | 0.23                                              |
| 2.8                            | 37/228                                                    | 53/276                                                      | 0.55 (0.28–1.08), $p = 0.081$                                                 | <b>0.32 (0.18–0.58), <math>p &lt; .001</math></b>                               | 0.23                                              |
| 2.9                            | 39/238                                                    | 51/266                                                      | 0.55 (0.28–1.05), $p = 0.071$                                                 | <b>0.32 (0.17–0.58), <math>p &lt; .001</math></b>                               | 0.22                                              |
| 3.0                            | 40/240                                                    | 50/264                                                      | 0.53 (0.28–1.02), $p = 0.059$                                                 | <b>0.32 (0.17–0.58), <math>p &lt; .001</math></b>                               | 0.24                                              |

**B. Interaction analysis for 10-year invasive breast event rates**

| Cut-off<br>( $DS > x$ )<br>$x$ | Events and<br>number<br>low risk<br>group ( $DS \leq x$ ) | Events and<br>number<br>elevated risk<br>group ( $DS > x$ ) | RT Effect (No RT/RT)<br>low risk group<br>( $DS \leq x$ )<br>HR (95% CI), $p$ | RT Effect (No RT/RT)<br>elevated risk group<br>( $DS > x$ )<br>HR (95% CI), $p$ | RT: ( $DS > x$ )<br>Interaction<br>LR test<br>$p$ |
|--------------------------------|-----------------------------------------------------------|-------------------------------------------------------------|-------------------------------------------------------------------------------|---------------------------------------------------------------------------------|---------------------------------------------------|
| 1.0                            | 10/147                                                    | 21/357                                                      | 0.87 (0.25–3.01), $p = 0.829$                                                 | <b>0.32 (0.13–0.84), <math>p = 0.020</math></b>                                 | 0.21                                              |
| 2.0                            | 12/182                                                    | 19/322                                                      | 0.88 (0.28–2.73), $p = 0.825$                                                 | <b>0.29 (0.10–0.79), <math>p = 0.016</math></b>                                 | 0.14                                              |
| 2.5                            | 13/202                                                    | 18/302                                                      | 1.10 (0.37–3.28), $p = 0.860$                                                 | <b>0.22 (0.07–0.66), <math>p = 0.007</math></b>                                 | <b>0.033</b>                                      |
| 2.6                            | 13/203                                                    | 18/301                                                      | 1.09 (0.37–3.25), $p = 0.876$                                                 | <b>0.21 (0.07–0.64), <math>p = 0.006</math></b>                                 | <b>0.035</b>                                      |
| 2.7                            | 13/212                                                    | 18/292                                                      | 1.12 (0.38–3.33), $p = 0.841$                                                 | <b>0.20 (0.07–0.62), <math>p = 0.005</math></b>                                 | <b>0.029</b>                                      |
| 2.8                            | 13/228                                                    | 18/276                                                      | 1.15 (0.38–3.41), $p = 0.807$                                                 | <b>0.22 (0.07–0.68), <math>p = 0.008</math></b>                                 | <b>0.024</b>                                      |
| 2.9                            | 14/238                                                    | 17/266                                                      | 0.94 (0.33–2.69), $p = 0.915$                                                 | <b>0.22 (0.07–0.69), <math>p = 0.009</math></b>                                 | 0.057                                             |
| 3.0                            | 15/240                                                    | 16/264                                                      | 0.84 (0.30–2.31), $p = 0.734$                                                 | <b>0.24 (0.08–0.74), <math>p = 0.013</math></b>                                 | 0.093                                             |

Multivariable Cox proportional hazards analysis of the association of RT, categorical  $DS > x$ , and their interaction  $RT:DS > x$  with 10-year breast event rates. Event counts, patient counts, hazard ratios with 95% confidence intervals and  $p$ -values are given in the categorical low ( $DS \leq x$ ) and elevated ( $DS > x$ ) risk groups for continuous  $DS$  thresholds between 1.0 and 3.0. The  $p$ -value for interaction of  $RT:(DS > x)$  included in the analysis is also provided. **A.** 10-year total BE risks in the Validation Cohort data; **B.** 10-year invasive BE risks in the Validation Cohort data. The DCISionRT test identified patients in low and elevated risk groups defined as  $DS \leq x$  between  $x = 1.0$  and  $x = 3.0$ .

Patients in the low risk groups ( $DS \leq x$ ) had non-significant differences in 10-year invasive and total breast event rates. Patients in the elevated risk groups ( $DS > x$ ) had significant RT reduction on 10-year invasive ( $HR = 0.20$  to  $HR = 0.32$ ,  $p \leq 0.02$ ) and 10-year total ( $HR = 0.32$  to  $HR = 0.38$ ,  $p < 0.001$ ) breast event rates. No significant interaction effect of  $DS$  risk group and RT was shown for 10-year TotBE, while a significant interaction effect indicated a superior RT response for patients with  $2.5 \leq DS \leq 2.8$  for 10-year InvBE.

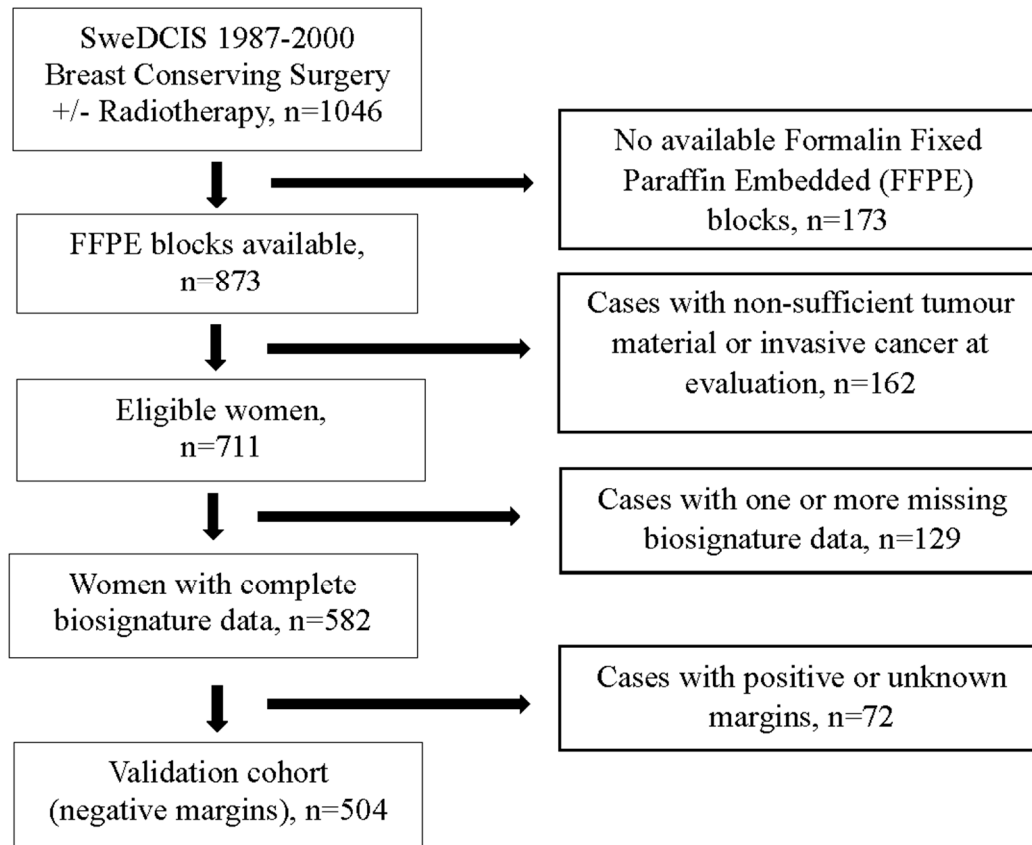

**Figure S1.** Flow chart describing women from the randomized SweDCIS trial for evaluation of four clinical markers (age, size, surgical margin status, and palpability) and seven biomarkers (PR, HER2, Ki67, FOXA1, COX2, p16/INK4A, SIAH2) included in the DCISionRT biosignature.
